# Supplementary material for: Nitrate formation and iron dissolution in the heterogeneous reactions of NH3 on nano α-Fe2O3
Source: Royal Society of Chemistry journal article supplement (doi:10.1039/d3en00494e), 2023-01-01
Supplement: d3en00494e1.pdf [file d3en00494e1.pdf]

**Electronic Supplementary Information (ESI )**

**Nitrate formation and iron dissolution in the heterogeneous reactions of NH<sub>3</sub> on nano  $\alpha$ -Fe<sub>2</sub>O<sub>3</sub>**

Ruixue Wang, Kun Li\*, Narcisse Tsona Tchinda, Wenxing Wang, Lin Du\*

Environment Research Institute, Shandong University, Binhai Road 72, Qingdao, 266237,  
China

\*Corresponding authors.

E-mail: kun.li@sdu.edu.cn (Kun Li); lindu@sdu.edu.cn (Lin Du).

## S1. Gases supply system

The gas supply system is shown in Figure S1. Mass flow controller was used to control high-purity  $\text{N}_2$  and  $\text{O}_2$  and simulate atmospheric conditions (79 vol.%  $\text{N}_2$  + 21 vol.%  $\text{O}_2$ ). By bubbling ultra-pure water and controlling the flow of  $\text{N}_2$ , the relative humidity (RH) in the reaction tank was adjusted to the required experimental conditions.

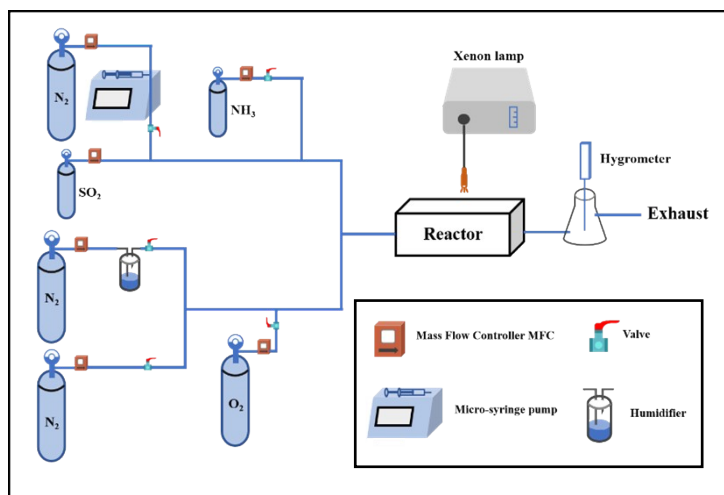

**Figure S1.** Air supply system.

The concentration of  $\text{SO}_2$  and  $\text{NH}_3$  was controlled by a mass flow controller. Liquid organic acids (formic acid, acetic acid and acrylic acid) were continuously injected into the gas pipeline through a single channel injection pump (Model: ISPLab01, DK Infusetek Co., LTD., China), and evaporate into gas at a certain flow rate of  $\text{N}_2$  into the reaction chamber. During the experiment, a three-hole conical flask was added behind the reaction chamber to allow the reaction air to pass through. The hygrometer (Model:HM42PROBE, VAISALA, Finland) was inserted into the bottle through the upper hole and sealed with a soft rubber plug to measure humidity online. The gas lines in the experiment are made of Teflon tubes, controlled by mass flow controllers and valves. The gas entered the reaction chamber after mixing, and the total flow rate was

400 mL·min<sup>-1</sup>. The infrared spectrum was then measured.

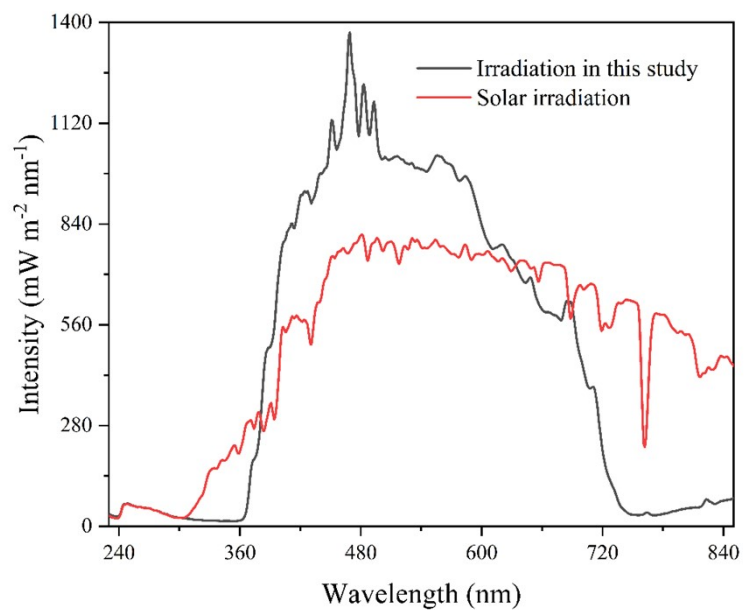

**Figure S2.** Comparison of xenon lamp and sunlight spectrum.

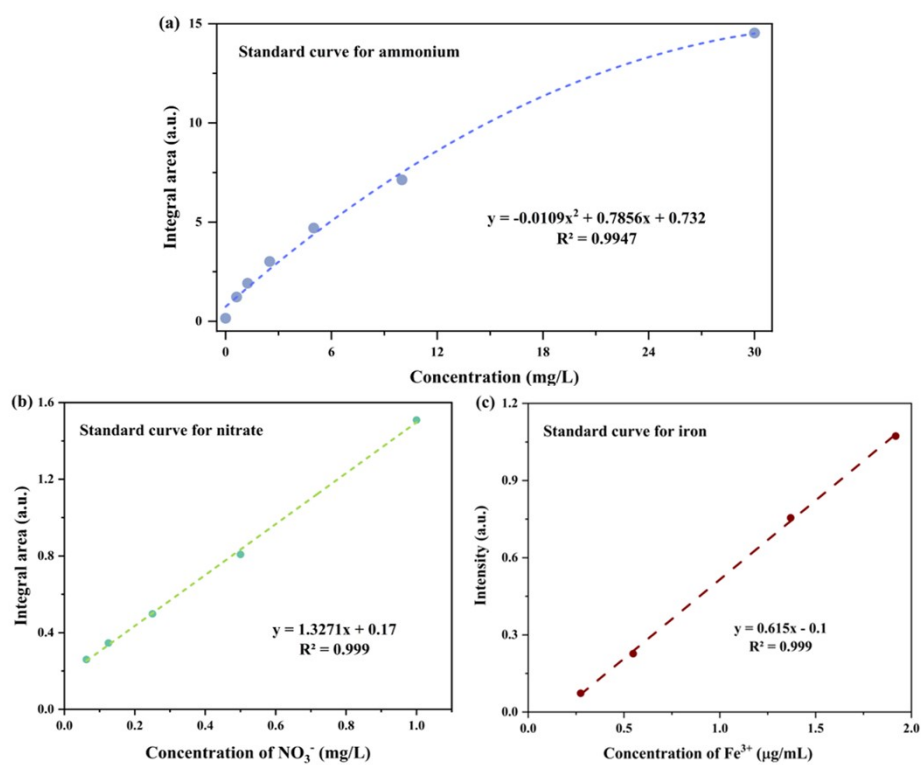

**Figure S3.** Standard curve of (a) NH<sub>4</sub><sup>+</sup> (b) NO<sub>3</sub><sup>-</sup> (c) Fe<sup>2+</sup>.

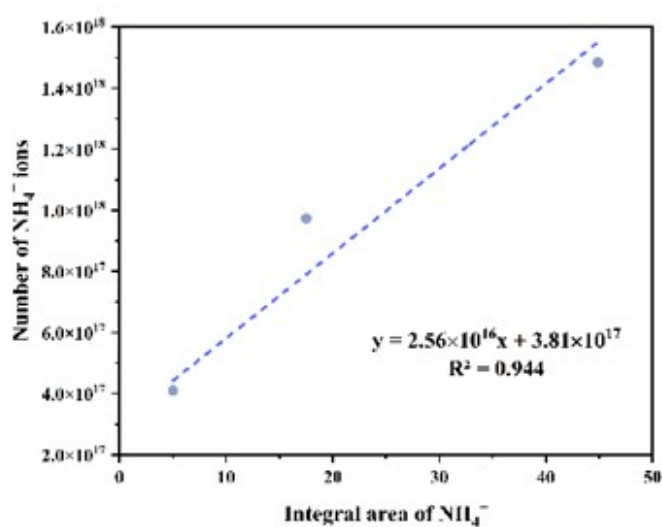

**Figure S4.** Standard curve of the integration area of ammonium ion number and its infrared characteristic peak.

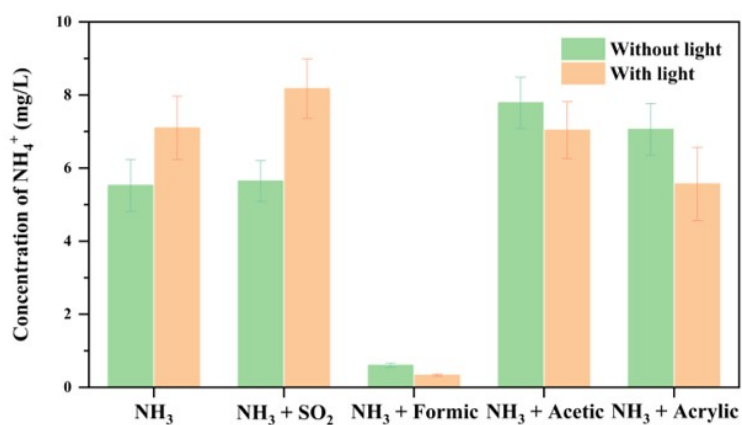

**Figure S5.** Concentrations of  $\text{NH}_4^+$  on the surface of particulate matter after different reactions determined by IC. Note that the  $\text{NH}_4^+$  detected by IC are the total amount of  $\text{NH}_4^+$  and adsorbed  $\text{NH}_3$  on the surface of  $\alpha\text{-Fe}_2\text{O}_3$  in the IR spectra.

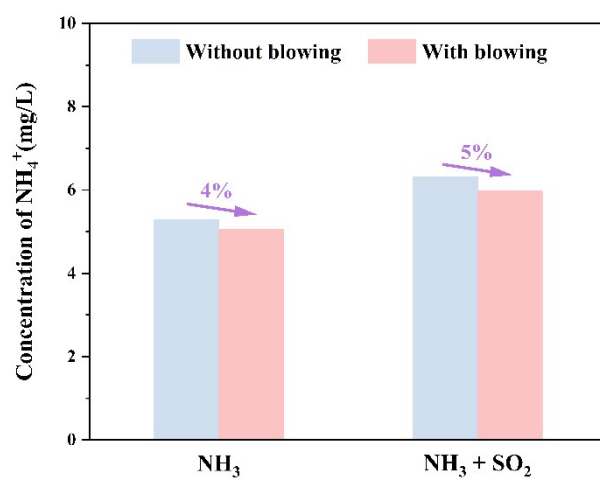

**Figure S6.** Concentration of  $\text{NH}_4^+$  with or without blowing. Note that the  $\text{NH}_4^+$  detected by IC are the total amount of  $\text{NH}_4^+$  and adsorbed  $\text{NH}_3$  on the surface of  $\alpha\text{-Fe}_2\text{O}_3$  in the IR spectra.

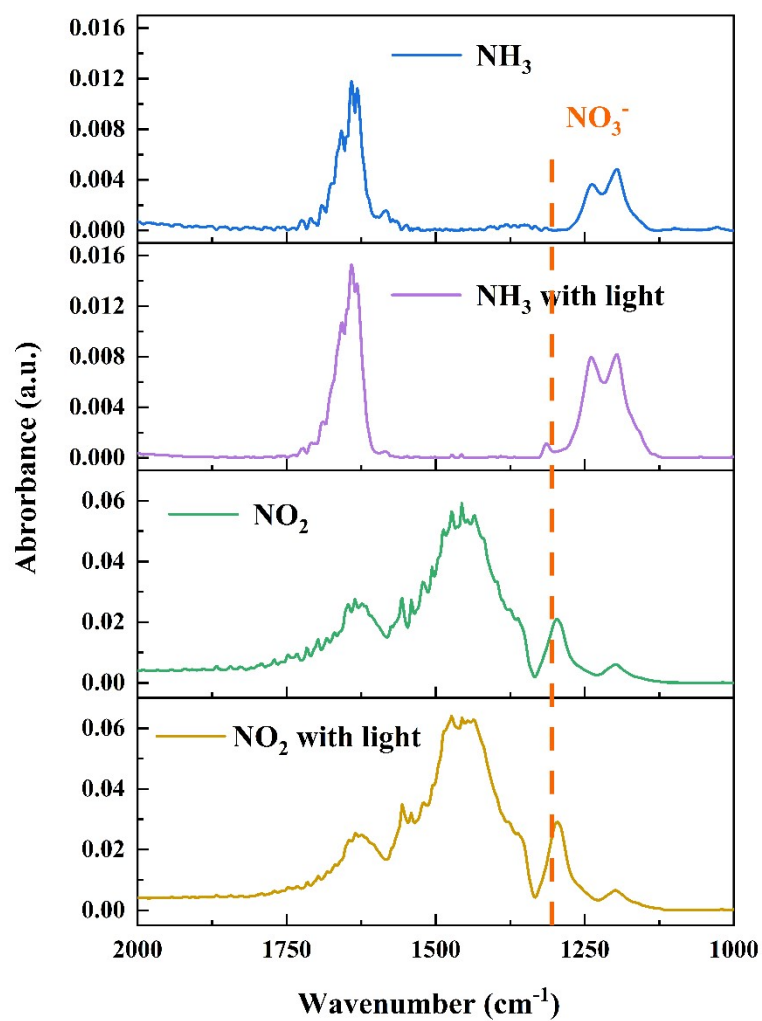

**Figure S7.** Comparison of infrared spectra of  $\text{NO}_2$  and  $\text{NH}_3$  on nano  $\alpha\text{-Fe}_2\text{O}_3$ .
